# Supplementary material
Source: Springer Nature journal article supplement (https://www.springermedizin.de/resource/supplementary/12877_2011_767_MOESM2_ESM.pdf/9440284)

# Kaplan-Meier survival estimates

women

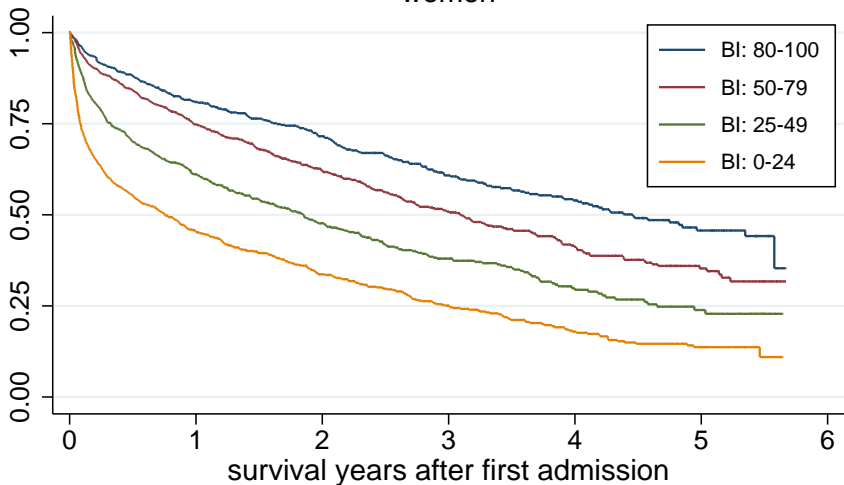

Number at risk

|            |     |     |     |     |     |    |
|------------|-----|-----|-----|-----|-----|----|
| BI: 80-100 | 523 | 402 | 317 | 221 | 146 | 53 |
| BI: 50-79  | 856 | 607 | 411 | 263 | 135 | 50 |
| BI: 25-49  | 643 | 376 | 242 | 133 | 61  | 24 |
| BI: 0-24   | 852 | 351 | 207 | 117 | 58  | 26 |

Supplement: MOESM2 [file 9440284]
